# Supplementary material for: Deep Sequencing of the Scutellaria baicalensis Georgi Transcriptome Reveals Flavonoid Biosynthetic Profiling and Organ-Specific Gene Expression
Source: PLoS One. 2015 Aug 28;10(8):e0136397. doi: 10.1371/journal.pone.0136397 (PMC4552754; doi:10.1371/journal.pone.0136397)
Supplement: S2 Table — (XLSX) [file pone.0136397.s003.xlsx]

## Sheet: BBH
Table S2: KEGG pathways identified by KEGG automatic annotation server (KAAS)
KEGG Pathway Entry	KEGG Pathway Name
KO00010	Glycolysis / Gluconeogenesis (35)
KO00020	Citrate cycle (TCA cycle) (20)
KO00030	Pentose phosphate pathway (18)
KO00040	Pentose and glucuronate interconversions (18)
KO00051	Fructose and mannose metabolism (21)
KO00052	Galactose metabolism (20)
KO00053	Ascorbate and aldarate metabolism (14)
KO00061	Fatty acid biosynthesis (15)
KO00062	Fatty acid elongation (13)
KO00071	Fatty acid degradation (22)
KO00072	Synthesis and degradation of ketone bodies (3)
KO00073	Cutin, suberine and wax biosynthesis (8)
KO00100	Steroid biosynthesis (18)
KO00120	Primary bile acid biosynthesis (1)
KO00130	Ubiquinone and other terpenoid-quinone biosynthesis (20)
KO00140	Steroid hormone biosynthesis (11)
KO00190	Oxidative phosphorylation (97)
KO00195	Photosynthesis (40)
KO00196	Photosynthesis - antenna proteins (12)
KO00230	Purine metabolism (97)
KO00232	Caffeine metabolism (3)
KO00240	Pyrimidine metabolism (76)
KO00250	Alanine, aspartate and glutamate metabolism (29)
KO00253	Tetracycline biosynthesis (4)
KO00254	Aflatoxin biosynthesis (1)
KO00260	Glycine, serine and threonine metabolism (35)
KO00261	Monobactam biosynthesis (6)
KO00270	Cysteine and methionine metabolism (35)
KO00280	Valine, leucine and isoleucine degradation (26)
KO00281	Geraniol degradation (2)
KO00290	Valine, leucine and isoleucine biosynthesis (10)
KO00300	Lysine biosynthesis (11)
KO00310	Lysine degradation (19)
KO00330	Arginine and proline metabolism (44)
KO00332	Carbapenem biosynthesis (1)
KO00340	Histidine metabolism (13)
KO00350	Tyrosine metabolism (18)
KO00360	Phenylalanine metabolism (17)
KO00361	Chlorocyclohexane and chlorobenzene degradation (1)
KO00362	Benzoate degradation (7)
KO00363	Bisphenol degradation (2)
KO00364	Fluorobenzoate degradation (1)
KO00380	Tryptophan metabolism (20)
KO00400	Phenylalanine, tyrosine and tryptophan biosynthesis (25)
KO00401	Novobiocin biosynthesis (2)
KO00410	beta-Alanine metabolism (19)
KO00430	Taurine and hypotaurine metabolism (4)
KO00440	Phosphonate and phosphinate metabolism (3)
KO00450	Selenocompound metabolism (10)
KO00460	Cyanoamino acid metabolism (10)
KO00471	D-Glutamine and D-glutamate metabolism (4)
KO00473	D-Alanine metabolism (1)
KO00480	Glutathione metabolism (19)
KO00500	Starch and sucrose metabolism (40)
KO00510	N-Glycan biosynthesis (31)
KO00511	Other glycan degradation (10)
KO00512	Mucin type O-glycan biosynthesis (1)
KO00513	Various types of N-glycan biosynthesis (22)
KO00514	Other types of O-glycan biosynthesis (3)
KO00520	Amino sugar and nucleotide sugar metabolism (41)
KO00521	Streptomycin biosynthesis (5)
KO00523	Polyketide sugar unit biosynthesis (2)
KO00524	Butirosin and neomycin biosynthesis (1)
KO00531	Glycosaminoglycan degradation (6)
KO00532	Glycosaminoglycan biosynthesis - chondroitin sulfate / dermatan sulfate (2)
KO00533	Glycosaminoglycan biosynthesis - keratan sulfate (1)
KO00534	Glycosaminoglycan biosynthesis - heparan sulfate / heparin (4)
KO00540	Lipopolysaccharide biosynthesis (8)
KO00550	Peptidoglycan biosynthesis (6)
KO00561	Glycerolipid metabolism (31)
KO00562	Inositol phosphate metabolism (18)
KO00563	Glycosylphosphatidylinositol(GPI)-anchor biosynthesis (21)
KO00564	Glycerophospholipid metabolism (37)
KO00565	Ether lipid metabolism (9)
KO00590	Arachidonic acid metabolism (12)
KO00591	Linoleic acid metabolism (8)
KO00592	alpha-Linolenic acid metabolism (14)
KO00600	Sphingolipid metabolism (17)
KO00601	Glycosphingolipid biosynthesis - lacto and neolacto series (1)
KO00603	Glycosphingolipid biosynthesis - globo series (6)
KO00604	Glycosphingolipid biosynthesis - ganglio series (3)
KO00620	Pyruvate metabolism (35)
KO00623	Toluene degradation (1)
KO00624	Polycyclic aromatic hydrocarbon degradation (1)
KO00625	Chloroalkane and chloroalkene degradation (6)
KO00626	Naphthalene degradation (3)
KO00627	Aminobenzoate degradation (6)
KO00630	Glyoxylate and dicarboxylate metabolism (30)
KO00633	Nitrotoluene degradation (1)
KO00640	Propanoate metabolism (17)
KO00643	Styrene degradation (4)
KO00650	Butanoate metabolism (14)
KO00660	C5-Branched dibasic acid metabolism (5)
KO00670	One carbon pool by folate (13)
KO00680	Methane metabolism (20)
KO00710	Carbon fixation in photosynthetic organisms (26)
KO00720	Carbon fixation pathways in prokaryotes (16)
KO00730	Thiamine metabolism (8)
KO00740	Riboflavin metabolism (9)
KO00750	Vitamin B6 metabolism (7)
KO00760	Nicotinate and nicotinamide metabolism (12)
KO00770	Pantothenate and CoA biosynthesis (15)
KO00780	Biotin metabolism (9)
KO00785	Lipoic acid metabolism (2)
KO00790	Folate biosynthesis (12)
KO00791	Atrazine degradation (1)
KO00830	Retinol metabolism (13)
KO00860	Porphyrin and chlorophyll metabolism (34)
KO00900	Terpenoid backbone biosynthesis (31)
KO00901	Indole alkaloid biosynthesis (1)
KO00902	Monoterpenoid biosynthesis (3)
KO00903	Limonene and pinene degradation (2)
KO00904	Diterpenoid biosynthesis (9)
KO00905	Brassinosteroid biosynthesis (6)
KO00906	Carotenoid biosynthesis (17)
KO00908	Zeatin biosynthesis (4)
KO00909	Sesquiterpenoid and triterpenoid biosynthesis (5)
KO00910	Nitrogen metabolism (14)
KO00920	Sulfur metabolism (15)
KO00930	Caprolactam degradation (4)
KO00940	Phenylpropanoid biosynthesis (19)
KO00941	Flavonoid biosynthesis (11)
KO00942	Anthocyanin biosynthesis (1)
KO00944	Flavone and flavonol biosynthesis (3)
KO00945	Stilbenoid, diarylheptanoid and gingerol biosynthesis (5)
KO00950	Isoquinoline alkaloid biosynthesis (8)
KO00960	Tropane, piperidine and pyridine alkaloid biosynthesis (9)
KO00965	Betalain biosynthesis (2)
KO00966	Glucosinolate biosynthesis (1)
KO00970	Aminoacyl-tRNA biosynthesis (27)
KO00980	Metabolism of xenobiotics by cytochrome P450 (9)
KO00981	Insect hormone biosynthesis (2)
KO00982	Drug metabolism - cytochrome P450 (7)
KO00983	Drug metabolism - other enzymes (14)
KO01040	Biosynthesis of unsaturated fatty acids (13)
KO01051	Biosynthesis of ansamycins (1)
KO01053	Biosynthesis of siderophore group nonribosomal peptides (1)
KO01054	Nonribosomal peptide structures (1)
KO01055	Biosynthesis of vancomycin group antibiotics (1)
KO01200	Carbon metabolism (97)
KO01210	2-Oxocarboxylic acid metabolism (28)
KO01212	Fatty acid metabolism (34)
KO01220	Degradation of aromatic compounds (5)
KO01230	Biosynthesis of amino acids (105)
KO01502	Vancomycin resistance (3)
KO01503	Cationic antimicrobial peptide (CAMP) resistance (1)
KO02010	ABC transporters (9)
KO02020	Two-component system (15)
KO02030	Bacterial chemotaxis (1)
KO03008	Ribosome biogenesis in eukaryotes (57)
KO03010	Ribosome (127)
KO03013	RNA transport (95)
KO03015	mRNA surveillance pathway (50)
KO03018	RNA degradation (52)
KO03020	RNA polymerase (30)
KO03022	Basal transcription factors (29)
KO03030	DNA replication (33)
KO03040	Spliceosome (101)
KO03050	Proteasome (34)
KO03060	Protein export (26)
KO03070	Bacterial secretion system (6)
KO03320	PPAR signaling pathway (13)
KO03410	Base excision repair (26)
KO03420	Nucleotide excision repair (38)
KO03430	Mismatch repair (23)
KO03440	Homologous recombination (25)
KO03450	Non-homologous end-joining (8)
KO03460	Fanconi anemia pathway (29)
KO04010	MAPK signaling pathway (17)
KO04011	MAPK signaling pathway - yeast (7)
KO04012	ErbB signaling pathway (7)
KO04013	MAPK signaling pathway - fly (2)
KO04014	Ras signaling pathway (18)
KO04015	Rap1 signaling pathway (14)
KO04020	Calcium signaling pathway (14)
KO04022	cGMP - PKG signaling pathway (18)
KO04024	cAMP signaling pathway (20)
KO04060	Cytokine-cytokine receptor interaction (1)
KO04062	Chemokine signaling pathway (9)
KO04064	NF-kappa B signaling pathway (9)
KO04066	HIF-1 signaling pathway (19)
KO04068	FoxO signaling pathway (21)
KO04070	Phosphatidylinositol signaling system (16)
KO04071	Sphingolipid signaling pathway (22)
KO04075	Plant hormone signal transduction (37)
KO04080	Neuroactive ligand-receptor interaction (5)
KO04110	Cell cycle (62)
KO04111	Cell cycle - yeast (57)
KO04112	Cell cycle - Caulobacter (5)
KO04113	Meiosis - yeast (43)
KO04114	Oocyte meiosis (36)
KO04115	p53 signaling pathway (15)
KO04120	Ubiquitin mediated proteolysis (63)
KO04122	Sulfur relay system (9)
KO04130	SNARE interactions in vesicular transport (19)
KO04140	Regulation of autophagy (14)
KO04141	Protein processing in endoplasmic reticulum (83)
KO04142	Lysosome (43)
KO04144	Endocytosis (45)
KO04145	Phagosome (33)
KO04146	Peroxisome (39)
KO04150	mTOR signaling pathway (13)
KO04151	PI3K-Akt signaling pathway (36)
KO04152	AMPK signaling pathway (28)
KO04210	Apoptosis (7)
KO04260	Cardiac muscle contraction (18)
KO04261	Adrenergic signaling in cardiomyocytes (13)
KO04270	Vascular smooth muscle contraction (9)
KO04310	Wnt signaling pathway (20)
KO04320	Dorso-ventral axis formation (4)
KO04330	Notch signaling pathway (8)
KO04340	Hedgehog signaling pathway (7)
KO04350	TGF-beta signaling pathway (11)
KO04360	Axon guidance (8)
KO04370	VEGF signaling pathway (7)
KO04380	Osteoclast differentiation (6)
KO04390	Hippo signaling pathway (14)
KO04391	Hippo signaling pathway -fly (11)
KO04510	Focal adhesion (16)
KO04512	ECM-receptor interaction (3)
KO04520	Adherens junction (9)
KO04530	Tight junction (19)
KO04540	Gap junction (6)
KO04550	Signaling pathways regulating pluripotency of stem cells (9)
KO04610	Complement and coagulation cascades (1)
KO04611	Platelet activation (6)
KO04612	Antigen processing and presentation (14)
KO04614	Renin-angiotensin system (1)
KO04620	Toll-like receptor signaling pathway (7)
KO04621	NOD-like receptor signaling pathway (4)
KO04622	RIG-I-like receptor signaling pathway (6)
KO04623	Cytosolic DNA-sensing pathway (14)
KO04626	Plant-pathogen interaction (25)
KO04630	Jak-STAT signaling pathway (2)
KO04650	Natural killer cell mediated cytotoxicity (5)
KO04660	T cell receptor signaling pathway (8)
KO04662	B cell receptor signaling pathway (6)
KO04664	Fc epsilon RI signaling pathway (5)
KO04666	Fc gamma R-mediated phagocytosis (15)
KO04668	TNF signaling pathway (4)
KO04670	Leukocyte transendothelial migration (7)
KO04710	Circadian rhythm (9)
KO04711	Circadian rhythm - fly (2)
KO04712	Circadian rhythm - plant (20)
KO04713	Circadian entrainment (8)
KO04720	Long-term potentiation (10)
KO04721	Synaptic vesicle cycle (25)
KO04722	Neurotrophin signaling pathway (17)
KO04723	Retrograde endocannabinoid signaling (7)
KO04724	Glutamatergic synapse (12)
KO04725	Cholinergic synapse (8)
KO04726	Serotonergic synapse (10)
KO04727	GABAergic synapse (14)
KO04728	Dopaminergic synapse (14)
KO04730	Long-term depression (7)
KO04740	Olfactory transduction (2)
KO04742	Taste transduction (1)
KO04744	Phototransduction (2)
KO04745	Phototransduction - fly (3)
KO04750	Inflammatory mediator regulation of TRP channels (6)
KO04810	Regulation of actin cytoskeleton (23)
KO04910	Insulin signaling pathway (23)
KO04911	Insulin secretion (3)
KO04912	GnRH signaling pathway (7)
KO04913	Ovarian Steroidogenesis (4)
KO04914	Progesterone-mediated oocyte maturation (23)
KO04915	Estrogen signaling pathway (11)
KO04916	Melanogenesis (10)
KO04917	Prolactin signaling pathway (6)
KO04918	Thyroid hormone synthesis (7)
KO04919	Thyroid hormone signaling pathway (20)
KO04920	Adipocytokine signaling pathway (8)
KO04921	Oxytocin signaling pathway (20)
KO04922	Glucagon signaling pathway (19)
KO04923	Regulation of lipolysis in adipocyte (3)
KO04930	Type II diabetes mellitus (4)
KO04932	Non-alcoholic fatty liver disease (NAFLD) (55)
KO04940	Type I diabetes mellitus (2)
KO04960	Aldosterone-regulated sodium reabsorption (3)
KO04961	Endocrine and other factor-regulated calcium reabsorption (7)
KO04962	Vasopressin-regulated water reabsorption (9)
KO04964	Proximal tubule bicarbonate reclamation (8)
KO04966	Collecting duct acid secretion (12)
KO04970	Salivary secretion (6)
KO04971	Gastric acid secretion (6)
KO04972	Pancreatic secretion (12)
KO04973	Carbohydrate digestion and absorption (3)
KO04974	Protein digestion and absorption (7)
KO04975	Fat digestion and absorption (6)
KO04976	Bile secretion (9)
KO04977	Vitamin digestion and absorption (2)
KO04978	Mineral absorption (7)
KO05010	Alzheimer's disease (69)
KO05012	Parkinson's disease (72)
KO05014	Amyotrophic lateral sclerosis (ALS) (10)
KO05016	Huntington's disease (83)
KO05020	Prion diseases (6)
KO05030	Cocaine addiction (3)
KO05031	Amphetamine addiction (7)
KO05032	Morphine addiction (6)
KO05033	Nicotine addiction (2)
KO05034	Alcoholism (20)
KO05100	Bacterial invasion of epithelial cells (14)
KO05110	Vibrio cholerae infection (20)
KO05120	Epithelial cell signaling in Helicobacter pylori infection (16)
KO05130	Pathogenic Escherichia coli infection (12)
KO05131	Shigellosis (14)
KO05132	Salmonella infection (12)
KO05133	Pertussis (7)
KO05134	Legionellosis (13)
KO05140	Leishmaniasis (4)
KO05142	Chagas disease (American trypanosomiasis) (12)
KO05143	African trypanosomiasis (2)
KO05145	Toxoplasmosis (13)
KO05146	Amoebiasis (9)
KO05152	Tuberculosis (26)
KO05160	Hepatitis C (12)
KO05161	Hepatitis B (19)
KO05162	Measles (13)
KO05164	Influenza A (24)
KO05166	HTLV-I infection (49)
KO05168	Herpes simplex infection (30)
KO05169	Epstein-Barr virus infection (63)
KO05200	Pathways in cancer (40)
KO05202	Transcriptional misregulation in cancers (21)
KO05203	Viral carcinogenesis (45)
KO05204	Chemical carcinogenesis (7)
KO05205	Proteoglycans in cancer (22)
KO05206	MicroRNAs in cancer (25)
KO05210	Colorectal cancer (12)
KO05211	Renal cell carcinoma (9)
KO05212	Pancreatic cancer (7)
KO05213	Endometrial cancer (8)
KO05214	Glioma (10)
KO05215	Prostate cancer (16)
KO05216	Thyroid cancer (5)
KO05217	Basal cell carcinoma (4)
KO05218	Melanoma (7)
KO05219	Bladder cancer (6)
KO05220	Chronic myeloid leukemia (8)
KO05221	Acute myeloid leukemia (5)
KO05222	Small cell lung cancer (13)
KO05223	Non-small cell lung cancer (8)
KO05230	Central carbon metabolism in cancer (14)
KO05231	Choline metabolism in cancer (13)
KO05322	Systemic lupus erythematosus (8)
KO05323	Rheumatoid arthritis (17)
KO05340	Primary immunodeficiency (3)
KO05410	Hypertrophic cardiomyopathy (HCM) (6)
KO05412	Arrhythmogenic right ventricular cardiomyopathy (ARVC) (3)
KO05414	Dilated cardiomyopathy (DCM) (3)
KO05416	Viral myocarditis (5)

## Sheet: SBH
Table S2: KEGG pathways identified by KEGG automatic annotation server (KAAS)
KEGG Pathway Entry	KEGG Pathway Name
KO00010	Glycolysis / Gluconeogenesis (34)
KO00020	Citrate cycle (TCA cycle) (20)
KO00030	Pentose phosphate pathway (17)
KO00040	Pentose and glucuronate interconversions (15)
KO00051	Fructose and mannose metabolism (20)
KO00052	Galactose metabolism (19)
KO00053	Ascorbate and aldarate metabolism (12)
KO00061	Fatty acid biosynthesis (16)
KO00062	Fatty acid elongation (14)
KO00071	Fatty acid degradation (22)
KO00072	Synthesis and degradation of ketone bodies (3)
KO00073	Cutin, suberine and wax biosynthesis (8)
KO00100	Steroid biosynthesis (20)
KO00120	Primary bile acid biosynthesis (1)
KO00130	Ubiquinone and other terpenoid-quinone biosynthesis (20)
KO00140	Steroid hormone biosynthesis (5)
KO00190	Oxidative phosphorylation (99)
KO00195	Photosynthesis (45)
KO00196	Photosynthesis - antenna proteins (12)
KO00230	Purine metabolism (92)
KO00232	Caffeine metabolism (2)
KO00240	Pyrimidine metabolism (74)
KO00250	Alanine, aspartate and glutamate metabolism (29)
KO00253	Tetracycline biosynthesis (4)
KO00254	Aflatoxin biosynthesis (1)
KO00260	Glycine, serine and threonine metabolism (34)
KO00261	Monobactam biosynthesis (6)
KO00270	Cysteine and methionine metabolism (35)
KO00280	Valine, leucine and isoleucine degradation (27)
KO00281	Geraniol degradation (2)
KO00290	Valine, leucine and isoleucine biosynthesis (10)
KO00300	Lysine biosynthesis (10)
KO00310	Lysine degradation (17)
KO00330	Arginine and proline metabolism (43)
KO00340	Histidine metabolism (12)
KO00350	Tyrosine metabolism (20)
KO00360	Phenylalanine metabolism (17)
KO00361	Chlorocyclohexane and chlorobenzene degradation (1)
KO00362	Benzoate degradation (7)
KO00363	Bisphenol degradation (2)
KO00364	Fluorobenzoate degradation (1)
KO00380	Tryptophan metabolism (20)
KO00400	Phenylalanine, tyrosine and tryptophan biosynthesis (24)
KO00401	Novobiocin biosynthesis (3)
KO00410	beta-Alanine metabolism (19)
KO00430	Taurine and hypotaurine metabolism (3)
KO00440	Phosphonate and phosphinate metabolism (3)
KO00450	Selenocompound metabolism (11)
KO00460	Cyanoamino acid metabolism (8)
KO00471	D-Glutamine and D-glutamate metabolism (3)
KO00480	Glutathione metabolism (18)
KO00500	Starch and sucrose metabolism (37)
KO00510	N-Glycan biosynthesis (31)
KO00511	Other glycan degradation (10)
KO00513	Various types of N-glycan biosynthesis (22)
KO00514	Other types of O-glycan biosynthesis (2)
KO00520	Amino sugar and nucleotide sugar metabolism (41)
KO00521	Streptomycin biosynthesis (4)
KO00523	Polyketide sugar unit biosynthesis (1)
KO00524	Butirosin and neomycin biosynthesis (1)
KO00531	Glycosaminoglycan degradation (4)
KO00540	Lipopolysaccharide biosynthesis (8)
KO00550	Peptidoglycan biosynthesis (5)
KO00561	Glycerolipid metabolism (27)
KO00562	Inositol phosphate metabolism (17)
KO00563	Glycosylphosphatidylinositol(GPI)-anchor biosynthesis (21)
KO00564	Glycerophospholipid metabolism (37)
KO00565	Ether lipid metabolism (8)
KO00590	Arachidonic acid metabolism (11)
KO00591	Linoleic acid metabolism (7)
KO00592	alpha-Linolenic acid metabolism (15)
KO00600	Sphingolipid metabolism (13)
KO00603	Glycosphingolipid biosynthesis - globo series (3)
KO00604	Glycosphingolipid biosynthesis - ganglio series (2)
KO00620	Pyruvate metabolism (32)
KO00623	Toluene degradation (1)
KO00624	Polycyclic aromatic hydrocarbon degradation (1)
KO00625	Chloroalkane and chloroalkene degradation (6)
KO00626	Naphthalene degradation (3)
KO00627	Aminobenzoate degradation (5)
KO00630	Glyoxylate and dicarboxylate metabolism (28)
KO00640	Propanoate metabolism (16)
KO00643	Styrene degradation (3)
KO00650	Butanoate metabolism (16)
KO00660	C5-Branched dibasic acid metabolism (5)
KO00670	One carbon pool by folate (12)
KO00680	Methane metabolism (18)
KO00710	Carbon fixation in photosynthetic organisms (24)
KO00720	Carbon fixation pathways in prokaryotes (14)
KO00730	Thiamine metabolism (8)
KO00740	Riboflavin metabolism (7)
KO00750	Vitamin B6 metabolism (8)
KO00760	Nicotinate and nicotinamide metabolism (12)
KO00770	Pantothenate and CoA biosynthesis (16)
KO00780	Biotin metabolism (7)
KO00785	Lipoic acid metabolism (2)
KO00790	Folate biosynthesis (11)
KO00830	Retinol metabolism (12)
KO00860	Porphyrin and chlorophyll metabolism (33)
KO00900	Terpenoid backbone biosynthesis (29)
KO00901	Indole alkaloid biosynthesis (2)
KO00902	Monoterpenoid biosynthesis (4)
KO00903	Limonene and pinene degradation (2)
KO00904	Diterpenoid biosynthesis (9)
KO00905	Brassinosteroid biosynthesis (7)
KO00906	Carotenoid biosynthesis (17)
KO00908	Zeatin biosynthesis (4)
KO00909	Sesquiterpenoid and triterpenoid biosynthesis (7)
KO00910	Nitrogen metabolism (13)
KO00920	Sulfur metabolism (14)
KO00930	Caprolactam degradation (4)
KO00940	Phenylpropanoid biosynthesis (21)
KO00941	Flavonoid biosynthesis (12)
KO00942	Anthocyanin biosynthesis (2)
KO00944	Flavone and flavonol biosynthesis (2)
KO00945	Stilbenoid, diarylheptanoid and gingerol biosynthesis (5)
KO00950	Isoquinoline alkaloid biosynthesis (9)
KO00960	Tropane, piperidine and pyridine alkaloid biosynthesis (10)
KO00965	Betalain biosynthesis (2)
KO00966	Glucosinolate biosynthesis (3)
KO00970	Aminoacyl-tRNA biosynthesis (27)
KO00980	Metabolism of xenobiotics by cytochrome P450 (4)
KO00982	Drug metabolism - cytochrome P450 (5)
KO00983	Drug metabolism - other enzymes (12)
KO01040	Biosynthesis of unsaturated fatty acids (13)
KO01051	Biosynthesis of ansamycins (1)
KO01053	Biosynthesis of siderophore group nonribosomal peptides (1)
KO01200	Carbon metabolism (94)
KO01210	2-Oxocarboxylic acid metabolism (31)
KO01212	Fatty acid metabolism (36)
KO01220	Degradation of aromatic compounds (5)
KO01230	Biosynthesis of amino acids (99)
KO01502	Vancomycin resistance (2)
KO01503	Cationic antimicrobial peptide (CAMP) resistance (1)
KO02010	ABC transporters (7)
KO02020	Two-component system (10)
KO03008	Ribosome biogenesis in eukaryotes (56)
KO03010	Ribosome (127)
KO03013	RNA transport (96)
KO03015	mRNA surveillance pathway (49)
KO03018	RNA degradation (49)
KO03020	RNA polymerase (28)
KO03022	Basal transcription factors (29)
KO03030	DNA replication (33)
KO03040	Spliceosome (100)
KO03050	Proteasome (35)
KO03060	Protein export (26)
KO03070	Bacterial secretion system (6)
KO03320	PPAR signaling pathway (12)
KO03410	Base excision repair (27)
KO03420	Nucleotide excision repair (37)
KO03430	Mismatch repair (22)
KO03440	Homologous recombination (25)
KO03450	Non-homologous end-joining (8)
KO03460	Fanconi anemia pathway (29)
KO04010	MAPK signaling pathway (18)
KO04011	MAPK signaling pathway - yeast (4)
KO04012	ErbB signaling pathway (5)
KO04013	MAPK signaling pathway - fly (2)
KO04014	Ras signaling pathway (15)
KO04015	Rap1 signaling pathway (10)
KO04020	Calcium signaling pathway (8)
KO04022	cGMP - PKG signaling pathway (14)
KO04024	cAMP signaling pathway (11)
KO04062	Chemokine signaling pathway (9)
KO04064	NF-kappa B signaling pathway (9)
KO04066	HIF-1 signaling pathway (16)
KO04068	FoxO signaling pathway (20)
KO04070	Phosphatidylinositol signaling system (15)
KO04071	Sphingolipid signaling pathway (19)
KO04075	Plant hormone signal transduction (39)
KO04080	Neuroactive ligand-receptor interaction (2)
KO04110	Cell cycle (61)
KO04111	Cell cycle - yeast (56)
KO04112	Cell cycle - Caulobacter (5)
KO04113	Meiosis - yeast (42)
KO04114	Oocyte meiosis (35)
KO04115	p53 signaling pathway (14)
KO04120	Ubiquitin mediated proteolysis (60)
KO04122	Sulfur relay system (9)
KO04130	SNARE interactions in vesicular transport (19)
KO04140	Regulation of autophagy (14)
KO04141	Protein processing in endoplasmic reticulum (83)
KO04142	Lysosome (42)
KO04144	Endocytosis (43)
KO04145	Phagosome (32)
KO04146	Peroxisome (39)
KO04150	mTOR signaling pathway (13)
KO04151	PI3K-Akt signaling pathway (32)
KO04152	AMPK signaling pathway (29)
KO04210	Apoptosis (6)
KO04260	Cardiac muscle contraction (21)
KO04261	Adrenergic signaling in cardiomyocytes (14)
KO04270	Vascular smooth muscle contraction (8)
KO04310	Wnt signaling pathway (22)
KO04320	Dorso-ventral axis formation (4)
KO04330	Notch signaling pathway (8)
KO04340	Hedgehog signaling pathway (7)
KO04350	TGF-beta signaling pathway (11)
KO04360	Axon guidance (8)
KO04370	VEGF signaling pathway (6)
KO04380	Osteoclast differentiation (6)
KO04390	Hippo signaling pathway (14)
KO04391	Hippo signaling pathway -fly (12)
KO04510	Focal adhesion (16)
KO04512	ECM-receptor interaction (2)
KO04520	Adherens junction (10)
KO04530	Tight junction (23)
KO04540	Gap junction (5)
KO04550	Signaling pathways regulating pluripotency of stem cells (6)
KO04610	Complement and coagulation cascades (2)
KO04611	Platelet activation (7)
KO04612	Antigen processing and presentation (14)
KO04614	Renin-angiotensin system (1)
KO04620	Toll-like receptor signaling pathway (6)
KO04621	NOD-like receptor signaling pathway (6)
KO04622	RIG-I-like receptor signaling pathway (8)
KO04623	Cytosolic DNA-sensing pathway (14)
KO04626	Plant-pathogen interaction (31)
KO04630	Jak-STAT signaling pathway (2)
KO04650	Natural killer cell mediated cytotoxicity (4)
KO04660	T cell receptor signaling pathway (8)
KO04662	B cell receptor signaling pathway (5)
KO04664	Fc epsilon RI signaling pathway (4)
KO04666	Fc gamma R-mediated phagocytosis (16)
KO04668	TNF signaling pathway (4)
KO04670	Leukocyte transendothelial migration (9)
KO04710	Circadian rhythm (8)
KO04711	Circadian rhythm - fly (2)
KO04712	Circadian rhythm - plant (21)
KO04713	Circadian entrainment (5)
KO04720	Long-term potentiation (6)
KO04721	Synaptic vesicle cycle (25)
KO04722	Neurotrophin signaling pathway (14)
KO04723	Retrograde endocannabinoid signaling (5)
KO04724	Glutamatergic synapse (8)
KO04725	Cholinergic synapse (5)
KO04726	Serotonergic synapse (7)
KO04727	GABAergic synapse (10)
KO04728	Dopaminergic synapse (12)
KO04730	Long-term depression (5)
KO04740	Olfactory transduction (1)
KO04742	Taste transduction (1)
KO04744	Phototransduction (2)
KO04745	Phototransduction - fly (2)
KO04750	Inflammatory mediator regulation of TRP channels (4)
KO04810	Regulation of actin cytoskeleton (24)
KO04910	Insulin signaling pathway (22)
KO04911	Insulin secretion (3)
KO04912	GnRH signaling pathway (7)
KO04913	Ovarian Steroidogenesis (1)
KO04914	Progesterone-mediated oocyte maturation (24)
KO04915	Estrogen signaling pathway (8)
KO04916	Melanogenesis (7)
KO04917	Prolactin signaling pathway (5)
KO04918	Thyroid hormone synthesis (7)
KO04919	Thyroid hormone signaling pathway (19)
KO04920	Adipocytokine signaling pathway (7)
KO04921	Oxytocin signaling pathway (14)
KO04922	Glucagon signaling pathway (17)
KO04923	Regulation of lipolysis in adipocyte (1)
KO04930	Type II diabetes mellitus (4)
KO04932	Non-alcoholic fatty liver disease (NAFLD) (54)
KO04940	Type I diabetes mellitus (2)
KO04960	Aldosterone-regulated sodium reabsorption (3)
KO04961	Endocrine and other factor-regulated calcium reabsorption (7)
KO04962	Vasopressin-regulated water reabsorption (7)
KO04964	Proximal tubule bicarbonate reclamation (7)
KO04966	Collecting duct acid secretion (12)
KO04970	Salivary secretion (4)
KO04971	Gastric acid secretion (4)
KO04972	Pancreatic secretion (11)
KO04973	Carbohydrate digestion and absorption (4)
KO04974	Protein digestion and absorption (5)
KO04975	Fat digestion and absorption (6)
KO04976	Bile secretion (7)
KO04977	Vitamin digestion and absorption (2)
KO04978	Mineral absorption (7)
KO05010	Alzheimer's disease (69)
KO05012	Parkinson's disease (71)
KO05014	Amyotrophic lateral sclerosis (ALS) (8)
KO05016	Huntington's disease (82)
KO05020	Prion diseases (5)
KO05030	Cocaine addiction (2)
KO05031	Amphetamine addiction (4)
KO05032	Morphine addiction (4)
KO05033	Nicotine addiction (1)
KO05034	Alcoholism (17)
KO05100	Bacterial invasion of epithelial cells (14)
KO05110	Vibrio cholerae infection (20)
KO05120	Epithelial cell signaling in Helicobacter pylori infection (15)
KO05130	Pathogenic Escherichia coli infection (12)
KO05131	Shigellosis (14)
KO05132	Salmonella infection (12)
KO05133	Pertussis (7)
KO05134	Legionellosis (12)
KO05140	Leishmaniasis (5)
KO05142	Chagas disease (American trypanosomiasis) (9)
KO05143	African trypanosomiasis (2)
KO05144	Malaria (1)
KO05145	Toxoplasmosis (12)
KO05146	Amoebiasis (5)
KO05152	Tuberculosis (25)
KO05160	Hepatitis C (11)
KO05161	Hepatitis B (16)
KO05162	Measles (14)
KO05164	Influenza A (22)
KO05166	HTLV-I infection (49)
KO05168	Herpes simplex infection (29)
KO05169	Epstein-Barr virus infection (63)
KO05200	Pathways in cancer (35)
KO05202	Transcriptional misregulation in cancers (14)
KO05203	Viral carcinogenesis (46)
KO05204	Chemical carcinogenesis (5)
KO05205	Proteoglycans in cancer (19)
KO05206	MicroRNAs in cancer (22)
KO05210	Colorectal cancer (12)
KO05211	Renal cell carcinoma (8)
KO05212	Pancreatic cancer (5)
KO05213	Endometrial cancer (7)
KO05214	Glioma (6)
KO05215	Prostate cancer (13)
KO05216	Thyroid cancer (4)
KO05217	Basal cell carcinoma (3)
KO05218	Melanoma (4)
KO05219	Bladder cancer (3)
KO05220	Chronic myeloid leukemia (5)
KO05221	Acute myeloid leukemia (4)
KO05222	Small cell lung cancer (10)
KO05223	Non-small cell lung cancer (5)
KO05230	Central carbon metabolism in cancer (12)
KO05231	Choline metabolism in cancer (12)
KO05322	Systemic lupus erythematosus (8)
KO05323	Rheumatoid arthritis (15)
KO05340	Primary immunodeficiency (2)
KO05410	Hypertrophic cardiomyopathy (HCM) (6)
KO05412	Arrhythmogenic right ventricular cardiomyopathy (ARVC) (3)
KO05414	Dilated cardiomyopathy (DCM) (4)
KO05416	Viral myocarditis (6)
